# Supplementary material for: Moderately low nitrogen application mitigate the negative effects of salt stress on annual ryegrass seedlings
Source: PeerJ. 2020 Dec 3;8:e10427. doi: 10.7717/peerj.10427 (PMC7719293; doi:10.7717/peerj.10427)
Supplement: Supplemental Information 4 — Raw data of main physiological indicators in this study is given and can be distinguished by the column headers. [file peerj-08-10427-s004.xlsx]

## Sheet: biomass
N and salt concentration	before	after		relative change
1（N:2mM，Nacl：0mM）	25.63	30.54	4.91	0.191572			relative increase(%)	sd							0 mM NaCl	24.7531	15.3343	29.5017	4.16587	3.25314	5.28021
2（N:2mM，Nacl：0mM）	43.05	47.74	4.69	0.108943											50 mM NaCl	13.0665	17.638	12.7499	4.7255	3.45745	4.5309
3（N:2mM，Nacl：0mM）	39.37	45.65	6.28	0.159512	0.153343	0.0416587	15.3343	4.16587							100 mM NaCl	-1.94527	4.53892	-7.18329	3.33035	5.52527	1.01127
4（N:2mM，Nacl：50mM）	39.38	48.34	8.96	0.227527
5（N:2mM，Nacl：50mM）	51.51	58.43	6.92	0.134343
6（N:2mM，Nacl：50mM）	30.31	35.38	5.07	0.167272	0.17638	0.047255	17.638	4.7255
7（N:2mM，Nacl：100mM）	25.29	27.38	2.09	0.0826414
8（N:2mM，Nacl：100mM）	34.06	34.69	0.63	0.0184968
9（N:2mM，Nacl：100mM）	39.11	40.48	1.37	0.0350294	0.0453892	0.0333035	4.53892	3.33035
13（N:5mM，Nacl：0mM）	35.37	44.59	9.22	0.260673
14（N:5mM，Nacl：0mM）	29.29	38.82	9.53	0.325367
15（N:5mM，Nacl：0mM）	37.39	48.57	11.18	0.29901	0.295017	0.0325314	29.5017	3.25314
16（N:5mM，Nacl：50mM）	33.96	38.26	4.3	0.12662
17（N:5mM，Nacl：50mM）	28.43	32.05	4.62	0.162504
18（N:5mM，Nacl：50mM）	44.66	48.83	4.17	0.0933721	0.127499	0.0345745	12.7499	3.45745
19（N:5mM，Nacl：100mM）	37.97	36.62	-1.35	-0.0355544
20（N:5mM，Nacl：100mM）	31.67	30.26	-1.41	-0.0445216
21（N:5mM，Nacl：100mM）	33.82	29.24	-4.58	-0.135423	-0.0718329	0.0552527	-7.18329	5.52527
25（N:10mM，Nacl：0mM）	26.32	31.69	5.37	0.204027
26（N:10mM，Nacl：0mM）	22.3	29.13	6.83	0.306278
27（N:10mM，Nacl：0mM）	31.9	39.31	7.41	0.232288	0.247531	0.0528021	24.7531	5.28021
28（N:10mM，Nacl：50mM）	20.65	22.27	1.62	0.0784504
29（N:10mM，Nacl：50mM）	25.81	29.93	4.12	0.159628
30（N:10mM，Nacl：50mM）	22.22	25.64	3.42	0.153915	0.130665	0.045309	13.0665	4.5309
31（N:10mM，Nacl：100mM）	17.58	17.26	-0.32	-0.0182025
32（N:10mM，Nacl：100mM）	35.51	34.44	-1.07	-0.0301324
33（N:10mM，Nacl：100mM）	25.94	25.68	-0.26	-0.0100231	-0.0194527	0.0101127	-1.94527	1.01127

## Sheet: plant height
treatment	plant height(cm)
（N:2mM，Nacl：0mM）	21
（N:2mM，Nacl：0mM）	32
（N:2mM，Nacl：0mM）	30
（N:2mM，Nacl：50mM）	34.5
（N:2mM，Nacl：50mM）	30
（N:2mM，Nacl：50mM）	35
（N:2mM，Nacl：100mM）	25.7
（N:2mM，Nacl：100mM）	28.3
（N:2mM，Nacl：100mM）	30.2
（N:5mM，Nacl：0mM）	35.2
（N:5mM，Nacl：0mM）	36
（N:5mM，Nacl：0mM）	33.5
（N:5mM，Nacl：50mM）	27
（N:5mM，Nacl：50mM）	30
（N:5mM，Nacl：50mM）	29
（N:5mM，Nacl：100mM）	24
（N:5mM，Nacl：100mM）	23
（N:5mM，Nacl：100mM）	21
（N:10mM，Nacl：0mM）	36.5
（N:10mM，Nacl：0mM）	36
（N:10mM，Nacl：0mM）	28
（N:10mM，Nacl：50mM）	32
（N:10mM，Nacl：50mM）	28.5
（N:10mM，Nacl：50mM）	30
（N:10mM，Nacl：100mM）	17.9
（N:10mM，Nacl：100mM）	22.2
（N:10mM，Nacl：100mM）	24.5

## Sheet: POD
salt level	N level					POD activity
Nacl:100mM	N:0.5mM	0.014	0.086	0.468	0.151333	40.3556
Nacl:100mM	N:0.5mM	0.016	0.076	0.52	0.168	44.8
Nacl:100mM	N:0.5mM	0.014	0.086	0.512	0.166	44.2667
Nacl:100mM	N:0.5mM	0.014	0.103	0.51	0.165333	44.0889
Nacl:100mM	N:2mM	0.007	0.045	0.341	0.111333	29.6889
Nacl:100mM	N:2mM	0.013	0.0502	0.423	0.136667	36.4444
Nacl:100mM	N:2mM	0.011	0.074	0.504	0.164333	43.8222
Nacl:100mM	N:5mM	0.012	0.084	0.451	0.146333	39.0222
Nacl:100mM	N:5mM	0.018	0.069	0.425	0.135667	36.1778
Nacl:100mM	N:5mM	0.012	0.067	0.46	0.149333	39.8222
Nacl:100mM	N:5mM	0.008	0.075	0.476	0.156	41.6
Nacl:0mM	N:0.5mM	0.005	0.035	0.267	0.0873333	23.2889
Nacl:0mM	N:0.5mM	0.005	0.042	0.341	0.112	29.8667
Nacl:0mM	N:0.5mM	0.012	0.063	0.432	0.14	37.3333
Nacl:0mM	N:0.5mM	0.012	0.067	0.474	0.154	41.0667
Nacl:0mM	N:2mM	0.011	0.099	0.438	0.142333	37.9556
Nacl:0mM	N:2mM	0.009	0.055	0.41	0.133667	35.6444
Nacl:0mM	N:2mM	0.011	0.054	0.409	0.132667	35.3778
Nacl:0mM	N:5mM	0.015	0.065	0.435	0.14	37.3333
Nacl:0mM	N:5mM	0.008	0.053	0.425	0.139	37.0667
Nacl:0mM	N:5mM	0.004	0.023	0.201	0.0656667	17.5111
Nacl:0mM	N:5mM	0.01	0.064	0.472	0.154	41.0667
Nacl:50mM	N:0.5mM	0.009	0.07	0.501	0.164	43.7333
Nacl:50mM	N:0.5mM	0.015	0.067	0.458	0.147667	39.3778
Nacl:50mM	N:0.5mM	0.009	0.07	0.55	0.180333	48.0889
Nacl:50mM	N:2mM	0.009	0.072	0.552	0.181	48.2667
Nacl:50mM	N:2mM	0.01	0.059	0.427	0.139	37.0667
Nacl:50mM	N:2mM	0.012	0.074	0.513	0.167	44.5333
Nacl:50mM	N:5mM	0.013	0.054	0.344	0.110333	29.4222
Nacl:50mM	N:5mM	0.007	0.059	0.458	0.150333	40.0889
Nacl:50mM	N:5mM	0.007	0.049	0.39	0.127667	34.0444

## Sheet: CAT
salt level	N level						CAT activity
Nacl:100mM	N:0.5mM	0.047	0.04	0.009	0.038	0.0126667	33.7778
Nacl:100mM	N:0.5mM	0.056	0.051	0.019	0.037	0.0123333	32.8889
Nacl:100mM	N:0.5mM	0.058	0.053	0.025	0.033	0.011	29.3333
Nacl:100mM	N:2mM	0.062	0.055	-0.015	0.077	0.0256667	68.4444
Nacl:100mM	N:2mM	0.045	0.034	-0.023	0.068	0.0226667	60.4444
Nacl:100mM	N:2mM	0.057	0.046	-0.015	0.072	0.024	64
Nacl:100mM	N:5mM	0.105	0.091	0.025	0.08	0.0266667	71.1111
Nacl:100mM	N:5mM	0.044	0.034	-0.014	0.058	0.0193333	51.5556
Nacl:100mM	N:5mM	0.054	0.047	0.004	0.05	0.0166667	44.4444
Nacl:0mM	N:0.5mM	0.03	0.024	0.002	0.028	0.00933333	24.8889
Nacl:0mM	N:0.5mM	0.021	0.014	-0.019	0.04	0.0133333	35.5556
Nacl:0mM	N:0.5mM	0.047	0.04	0.005	0.042	0.014	37.3333
Nacl:0mM	N:0.5mM	0.033	0.027	-0.002	0.035	0.0116667	31.1111
Nacl:0mM	N:2mM	0.044	0.036	-0.001	0.045	0.015	40
Nacl:0mM	N:2mM	0.054	0.068	0.007	0.047	0.0156667	41.7778
Nacl:0mM	N:2mM	0.057	0.048	0.008	0.049	0.0163333	43.5556
Nacl:0mM	N:2mM	0.057	0.048	0.008	0.049	0.0163333	43.5556
Nacl:0mM	N:5mM	0.07	0.061	0.01	0.06	0.02	53.3333
Nacl:0mM	N:5mM	0.054	0.048	0.008	0.046	0.0153333	40.8889
Nacl:0mM	N:5mM	0.067	0.059	0.014	0.053	0.0176667	47.1111
Nacl:50mM	N:0.5mM	0.058	0.05	0.12	-0.062	-0.0206667	55.1111
Nacl:50mM	N:0.5mM	0.067	0.058	0.02	0.047	0.0156667	41.7778
Nacl:50mM	N:0.5mM	0.074	0.064	0.025	0.049	0.0163333	43.5556
Nacl:50mM	N:2mM	0.061	0.054	-0.017	0.078	0.026	69.3333
Nacl:50mM	N:2mM	0.053	0.04	-0.027	0.08	0.0266667	71.1111
Nacl:50mM	N:2mM	0.07	0.055	-0.017	0.087	0.029	77.3333
Nacl:50mM	N:5mM	0.045	0.034	-0.03	0.075	0.025	66.6667
Nacl:50mM	N:5mM	0.06	0.053	0.001	0.059	0.0196667	52.4444
Nacl:50mM	N:5mM	0.045	0.045	0.001	0.044	0.0146667	39.1111
Nacl:50mM	N:5mM	0.048	0.05	0.001	0.047	0.0156667	41.7778

## Sheet: ojip index average
		0 mM NaCl N0.5	N2	N5	nomorized data			50 mM NaCl N0.5	50N2	50N5	nomorized data			100mM NaCl N0.5	100N2	100N5	nomorized data
F300us		1.92606	2.03907	1.95665	1	1.05867	1.01588	2.013	1.8858	1.89206	1	0.936811	0.939921	1.83423	1.86508	1.84817	1	1.01681	1.0076
Fo		0.74708	0.7554	0.75275	1	1.01114	1.00759	0.709	0.736667	0.715	1	1.03902	1.00846	0.7147	0.724425	0.696975	1	1.01361	0.975199
Fm		3.14644	3.269	3.3146	1	1.03895	1.05344	3.0517	3.27473	3.05542	1	1.07308	1.00122	3.0601	3.20717	3.1034	1	1.04806	1.01415
Fj		2.0215	2.03937	2.04517	1	1.00884	1.01171	2.0521	2.02143	1.9754	1	0.985056	0.962624	1.95743	1.98005	1.9538	1	1.01155	0.998144
Fi		2.94768	3.008	3.01547	1	1.02046	1.023	2.8132	3.02647	2.85666	1	1.07581	1.01545	2.85523	2.99005	2.9054	1	1.04722	1.01757
Fv		2.39936	2.5136	2.56185	1	1.04761	1.06772	2.3427	2.53807	2.34042	1	1.08339	0.999027	2.3454	2.48275	2.40643	1	1.05856	1.02602
Vj		0.53115	0.510808	0.504489	1	0.961702	0.949805	0.573313	0.506199	0.538536	1	0.882937	0.93934	0.52986	0.50574	0.522279	1	0.954478	0.985693
Vi		0.917161	0.896165	0.883239	1	0.977107	0.963014	0.898194	0.902183	0.915075	1	1.00444	1.01879	0.912652	0.912547	0.91772	1	0.999885	1.00555
Mo		1.96549	2.04275	1.87974	1	1.03931	0.956369	2.22649	1.81104	2.01171	1	0.813404	0.903533	1.90933	1.83772	1.91354	1	0.962497	1.00221
Ss		0.270238	0.250058	0.268383	1	0.925327	0.993136	0.257496	0.279508	0.267701	1	1.08548	1.03963	0.277511	0.275199	0.272938	1	0.991669	0.98352
1-Ψo		0.53115	0.510808	0.504489	1	0.961702	0.949805	0.573313	0.506199	0.538536	1	0.882937	0.93934	0.52986	0.50574	0.522279	1	0.954478	0.985693
1-φPo		0.237437	0.23108	0.227101	1	0.973228	0.956471	0.23233	0.224955	0.23401	1	0.968257	1.00723	0.233554	0.225876	0.224584	1	0.967125	0.961593
φPo		0.762563	0.76892	0.772899	1	1.00834	1.01355	0.76767	0.775045	0.76599	1	1.00961	0.99781	0.766446	0.774124	0.775416	1	1.01002	1.0117
Ψo		0.46885	0.489192	0.495511	1	1.04339	1.05686	0.426687	0.493801	0.461464	1	1.15729	1.0815	0.47014	0.49426	0.477721	1	1.0513	1.01612
φEo		0.357528	0.37615	0.38298	1	1.05208	1.07119	0.327555	0.382718	0.353477	1	1.16841	1.07914	0.360337	0.382619	0.370432	1	1.06184	1.02802
φDo		0.237437	0.23108	0.227101	1	0.973228	0.956471	0.23233	0.224955	0.23401	1	0.968257	1.00723	0.233554	0.225876	0.224584	1	0.967125	0.961593
ABS/RC		4.85264	5.20089	4.82084	1	1.07176	0.993447	5.05888	4.61614	4.87671	1	0.912483	0.963991	4.70151	4.69399	4.725	1	0.998399	1.00499
TRo/RC		3.70044	3.99907	3.72602	1	1.0807	1.00691	3.88355	3.57772	3.73551	1	0.921249	0.96188	3.60345	3.63373	3.66384	1	1.0084	1.01676
ETo/RC		1.73495	1.95631	1.84628	1	1.12759	1.06417	1.65706	1.76668	1.72381	1	1.06615	1.04028	1.69413	1.79601	1.75029	1	1.06014	1.03315
DIo/RC		1.15219	1.20182	1.09482	1	1.04307	0.950203	1.17533	1.03842	1.1412	1	0.883518	0.970965	1.09806	1.06026	1.06116	1	0.965577	0.966395
RC/ABS		0.206073	0.192275	0.207433	1	0.933041	1.0066	0.197672	0.216631	0.205056	1	1.09591	1.03735	0.212697	0.213038	0.21164	1	1.0016	0.99503
ABS/Cso		0.74708	0.7554	0.75275	1	1.01114	1.00759	0.709	0.736667	0.715	1	1.03902	1.00846	0.7147	0.724425	0.696975	1	1.01361	0.975199
TRo/Cso		0.569696	0.580842	0.581799	1	1.01957	1.02125	0.544278	0.57095	0.547683	1	1.049	1.00625	0.547779	0.560795	0.540445	1	1.02376	0.986613
ETo/Cso		0.267102	0.284143	0.288288	1	1.0638	1.07932	0.232237	0.281936	0.252736	1	1.214	1.08827	0.257533	0.277179	0.258182	1	1.07628	1.00252
DIo/Cso		0.177384	0.174558	0.170951	1	0.984066	0.963731	0.164722	0.165717	0.167317	1	1.00604	1.01576	0.166921	0.16363	0.15653	1	0.980285	0.937745
RC/Cso		0.153953	0.145245	0.156145	1	0.943432	1.01424	0.14015	0.159585	0.146615	1	1.13868	1.04613	0.152015	0.15433	0.147508	1	1.01523	0.970353
PIABS		0.584208	0.612722	0.693397	1	1.04881	1.1869	0.486109	0.728087	0.575154	1	1.49779	1.18318	0.619329	0.713553	0.668383	1	1.15214	1.07921
PICS		0.43645	0.462851	0.521955	1	1.06049	1.19591	0.344652	0.536358	0.411235	1	1.55623	1.19319	0.442635	0.516916	0.465847	1	1.16782	1.05244
DFABS		-0.233433	-0.212736	-0.159018	1	0.911338	0.681215	-0.313266	-0.137816	-0.240216	1	0.439934	0.766812	-0.208078	-0.146574	-0.174974	1	0.704416	0.840906
DFCS		-0.360066	-0.334559	-0.282367	1	0.929162	0.78421	-0.46262	-0.270545	-0.38591	1	0.584812	0.834184	-0.353955	-0.28658	-0.331757	1	0.809653	0.937287

## Sheet: EL
salt level	N level	C1	Cmax	EL(%)
Nacl:100mM	N:0.5mM	365	522	69.9234
Nacl:100mM	N:0.5mM	405	508	79.7244
Nacl:100mM	N:0.5mM	325	435	74.7126
Nacl:100mM	N:0.5mM	265	397	66.7506
Nacl:100mM	N:2mM	184.2	330	55.8182
Nacl:100mM	N:2mM	123	260	47.3077
Nacl:100mM	N:2mM	163.3	295	55.3559
Nacl:100mM	N:2mM	140.5	285	49.2982
Nacl:100mM	N:5mM	186.2	265	70.2642
Nacl:100mM	N:5mM	223	349	63.8968
Nacl:100mM	N:5mM	177.2	301	58.8704
Nacl:100mM	N:5mM	223	355	62.8169
Nacl:0mM	N:0.5mM	68.2	204	33.4314
Nacl:0mM	N:0.5mM	61.9	189.2	32.7167
Nacl:0mM	N:0.5mM	43.7	158.9	27.5016
Nacl:0mM	N:0.5mM	66.9	191	35.0262
Nacl:0mM	N:2mM	49.4	164.3	30.067
Nacl:0mM	N:2mM	53	180.8	29.3142
Nacl:0mM	N:2mM	50.9	173.2	29.388
Nacl:0mM	N:5mM	72.1	187.7	38.4124
Nacl:0mM	N:5mM	55.8	182.3	30.6089
Nacl:0mM	N:5mM	53.6	164.6	32.5638
Nacl:0mM	N:5mM	59.4	182.2	32.6015
Nacl:50mM	N:0.5mM	122.8	281	43.7011
Nacl:50mM	N:0.5mM	114.9	255	45.0588
Nacl:50mM	N:0.5mM	111.1	242	45.9091
Nacl:50mM	N:0.5mM	155.2	301	51.5615
Nacl:50mM	N:2mM	177.5	309	57.4434
Nacl:50mM	N:2mM	151.1	301	50.1993
Nacl:50mM	N:2mM	101.9	225	45.2889
Nacl:50mM	N:5mM	135.4	273	49.5971
Nacl:50mM	N:5mM	143.9	252	57.1032
Nacl:50mM	N:5mM	129.1	255	50.6275
Nacl:50mM	N:5mM	150.7	309	48.7702

## Sheet: MDA
Salt	N	OD523	OD600		MDA content
Nacl:0mM	N:0.5mM	0.052	0.005	0.047	48.5161
Nacl:0mM	N:0.5mM	0.018	-0.019	0.037	38.1935
Nacl:0mM	N:0.5mM	0.033	-0.014	0.047	48.5161
Nacl:0mM	N:0.5mM	0.024	-0.014	0.038	39.2258
Nacl:0mM	N:2mM	0.04	-0.009	0.049	50.5806
Nacl:0mM	N:2mM	0.044	-0.008	0.052	53.6774
Nacl:0mM	N:2mM	0.04	-0.01	0.05	51.6129
Nacl:0mM	N:5mM	0.018	-0.018	0.036	37.1613
Nacl:0mM	N:5mM	0.025	-0.018	0.043	44.3871
Nacl:0mM	N:5mM	0.012	-0.019	0.031	32
Nacl:0mM	N:5mM	0.026	-0.018	0.044	45.4194
Nacl:50mM	N:0.5mM	0.021	-0.018	0.039	40.2581
Nacl:50mM	N:0.5mM	0.046	-0.008	0.054	55.7419
Nacl:50mM	N:0.5mM	0.032	-0.015	0.047	48.5161
Nacl:50mM	N:0.5mM	0.0395	-0.011	0.0505	52.129
Nacl:50mM	N:2mM	0.026	-0.009	0.035	36.129
Nacl:50mM	N:2mM	0.024	-0.014	0.038	39.2258
Nacl:50mM	N:2mM	0.026	-0.015	0.041	42.3226
Nacl:50mM	N:5mM	0.016	-0.019	0.035	36.129
Nacl:50mM	N:5mM	0.027	-0.015	0.042	43.3548
Nacl:50mM	N:5mM	0.022	-0.018	0.04	41.2903
Nacl:50mM	N:5mM	0.019	-0.02	0.039	40.2581
Nacl:100mM	N:0.5mM	0.049	-0.01	0.059	60.9032
Nacl:100mM	N:0.5mM	0.05	-0.012	0.062	64
Nacl:100mM	N:0.5mM	0.041	-0.015	0.056	57.8065
Nacl:100mM	N:2mM	0.029	-0.018	0.047	48.5161
Nacl:100mM	N:2mM	0.031	-0.02	0.051	52.6452
Nacl:100mM	N:2mM	0.046	-0.007	0.053	54.7097
Nacl:100mM	N:5mM	0.038	-0.017	0.055	56.7742
Nacl:100mM	N:5mM	0.062	0.003	0.059	60.9032
Nacl:100mM	N:5mM	0.028	-0.018	0.046	47.4839
Nacl:100mM	N:5mM	0.039	-0.016	0.055	56.7742

## Sheet: chlorophyll content 
salt	N	663nm	645nm	a	b	chl（mg/g）
Nacl:100mM	N:0.5mM	0.285	0.091	1.01685	0.225339	1.24219
Nacl:100mM	N:0.5mM	0.296	0.094	1.0565	0.23052	1.28702
Nacl:100mM	N:0.5mM	0.281	0.091	1.00159	0.230943	1.23253
Nacl:100mM	N:0.5mM	0.295	0.103	1.04569	0.293697	1.33939
Nacl:100mM	N:2mM	0.389	0.123	1.38885	0.299283	1.68814
Nacl:100mM	N:2mM	0.493	0.157	1.7593	0.386955	2.14625
Nacl:100mM	N:2mM	0.415	0.133	1.4803	0.331497	1.8118
Nacl:100mM	N:2mM	0.597	0.192	2.12897	0.481491	2.61046
Nacl:100mM	N:5mM	0.477	0.155	1.6998	0.395643	2.09544
Nacl:100mM	N:5mM	0.432	0.156	1.5273	0.465552	1.99285
Nacl:100mM	N:5mM	0.389	0.123	1.38885	0.299283	1.68814
Nacl:100mM	N:5mM	0.396	0.125	1.41401	0.303204	1.71721
Nacl:0mM	N:0.5mM	0.325	0.11	1.15473	0.299715	1.45444
Nacl:0mM	N:0.5mM	0.332	0.11	1.18144	0.289908	1.47135
Nacl:0mM	N:0.5mM	0.317	0.112	1.12265	0.324651	1.4473
Nacl:0mM	N:0.5mM	0.316	0.111	1.11961	0.319188	1.4388
Nacl:0mM	N:2mM	0.371	0.12	1.3225	0.303909	1.62641
Nacl:0mM	N:2mM	0.369	0.118	1.31642	0.292983	1.6094
Nacl:0mM	N:2mM	0.367	0.125	1.30335	0.343833	1.64718
Nacl:0mM	N:5mM	0.36	0.126	1.27586	0.360504	1.63636
Nacl:0mM	N:5mM	0.391	0.129	1.39182	0.337665	1.72949
Nacl:0mM	N:5mM	0.378	0.124	1.3461	0.321558	1.66766
Nacl:50mM	N:0.5mM	0.35	0.104	1.25479	0.223506	1.4783
Nacl:50mM	N:0.5mM	0.333	0.107	1.18759	0.267915	1.4555
Nacl:50mM	N:0.5mM	0.336	0.111	1.19593	0.291168	1.4871
Nacl:50mM	N:0.5mM	0.345	0.113	1.22872	0.292287	1.52101
Nacl:50mM	N:2mM	0.436	0.137	1.55733	0.329532	1.88686
Nacl:50mM	N:2mM	0.448	0.146	1.59613	0.374496	1.97062
Nacl:50mM	N:2mM	0.492	0.159	1.75393	0.402084	2.15601
Nacl:50mM	N:2mM	0.305	0.098	1.08773	0.245367	1.3331
Nacl:50mM	N:5mM	0.404	0.125	1.44454	0.291996	1.73653
Nacl:50mM	N:5mM	0.382	0.124	1.36136	0.315954	1.67732
Nacl:50mM	N:5mM	0.387	0.129	1.37656	0.343269	1.71983
